# Supplementary material
Source: PubMed Central journal article supplement (PMC2612482)

# Supplementary Fig. 1

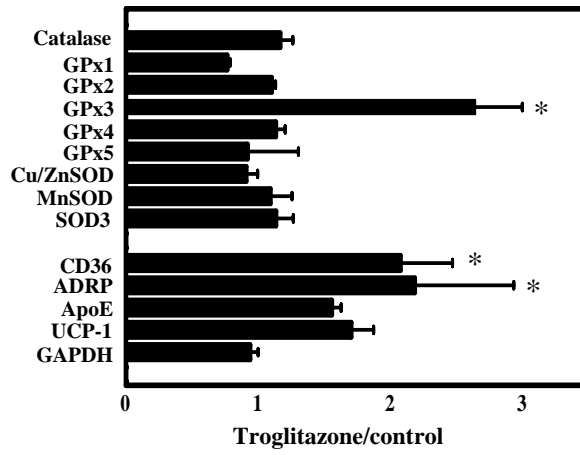

Supplement: MCB.00544-08_1.pdf [file MCB.00544-08_1.pdf]

## Supplementary Fig. 2

A

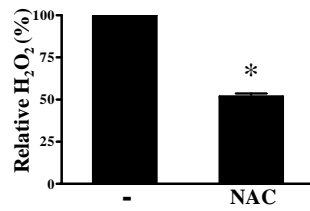

B

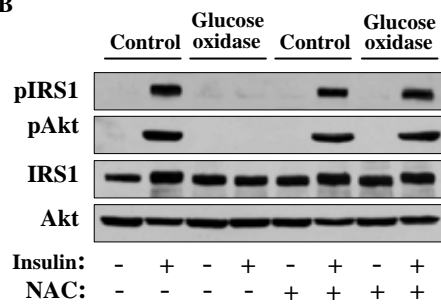

Supplement: MCB.00544-08_2.pdf [file MCB.00544-08_2.pdf]

# Supplementary Fig. 3

**A**

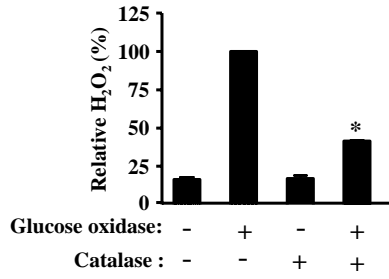

**B**

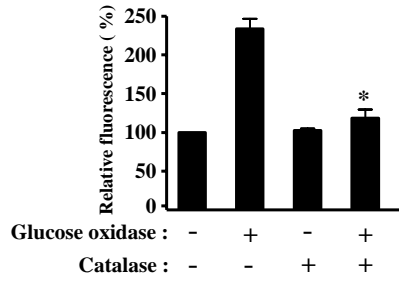

**C**

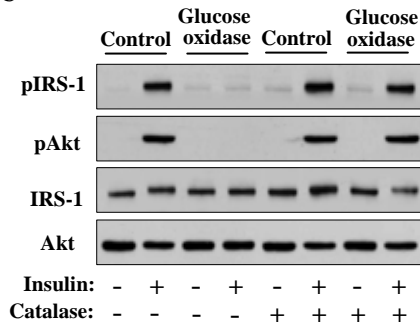

Supplement: MCB.00544-08_3.pdf [file MCB.00544-08_3.pdf]

## Supplementary Fig. 4

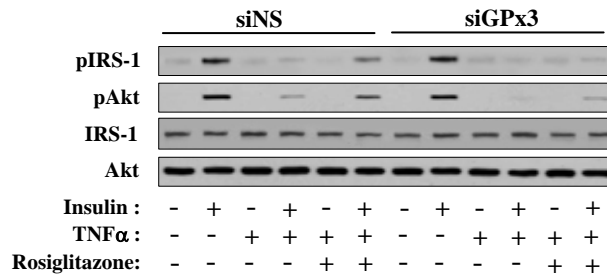

Supplement: MCB.00544-08_4.pdf [file MCB.00544-08_4.pdf]
